# Supplementary material for: Programmed Self-Assembly of DNA Nanosheets with Discrete Single-Molecule Thickness and Interfacial Mechanics: Design, Simulation, and Characterization
Source: MDPI journal article supplement (doi:10.3390/molecules28093686), 2023-04-24
Supplement: s1 [file s1]

Supplementary Materials for:

## **Programmed Self-Assembly of DNA Nanosheets with Discrete Single-Molecule Thickness and Interfacial Mechanics: Design, Simulation, and Characterization**

Keitel Cervantes-Salguero <sup>1,\*†</sup>, Yair Augusto Gutiérrez Fosado <sup>2</sup>, William Megone <sup>3</sup>, Julien E. Gautrot <sup>3,\*</sup> and Matteo Palma <sup>1,\*</sup>

<sup>1</sup> Department of Chemistry, School of Physical and Chemical Sciences, Queen Mary University of London, London E1 4NS, UK

<sup>2</sup> School of Physics and Astronomy, University of Edinburgh, Peter Guthrie Tait Road, Edinburgh EH9 3FD, UK

<sup>3</sup> School of Engineering and Materials Science, Queen Mary University of London, Mile End Road, London E1 4NS, UK

\* Correspondence: keitelcervantes@gmail.com (K.C.-S.); j.gautrot@qmul.ac.uk (J.E.G.); m.palma@qmul.ac.uk (M.P.)

† Current address: Micron School of Materials Science and Engineering, Boise State University, Boise, ID 83725, USA.

## Text S1

The DNA sequences for F-unit:

A: GTGCTGTATC CCATGTTACCTTCCAC CGACTGACTCTGACTGCGATG  
CCATGTTACCTTCCAC CTGATCTCTG

B: GATACAGCAC CCATGTTACCTTCCAC CATCGCAGTCAGAGTCAGTCG  
CCATGTTACCTTCCAC CAGAGATCAG

C<sub>chol</sub>: GTGGAAGGTAACATGG AAAAA - TEG - cholesterol

The DNA sequences for F-unit with short arms:

A<sub>short</sub>: GTGCTGTATC TACCTTCCAC CGACTGACTCTGACTGCGATG TACCTTCCAC  
CTGATCTCTG

B<sub>short</sub>: GATACAGCAC TACCTTCCAC CATCGCAGTCAGAGTCAGTCG TACCTTCCAC  
CAGAGATCAG

C<sub>chol</sub>: GTGGAAGGTAACATGG AAAAA - TEG - cholesterol

**Table S1:** The DNA sequences for F-unit

|                    |             |                                     | Melting temperature ( $T_m$ )      |                                    |
|--------------------|-------------|-------------------------------------|------------------------------------|------------------------------------|
|                    | Part        | Sequence                            | DPBS*                              | MgCl <sub>2</sub> **               |
| F-unit             | Sticky ends | SE1: GTGCTGTATC<br>SE1*: GATACAGCAC | 31.2 °C (0.1 μM)<br>37 °C (1 μM)   | 35.7 °C (0.1 μM)<br>41.7 °C (1 μM) |
|                    |             | SE2: CTGATCTCTG<br>SE2*: CAGAGATCAG | 29 °C (0.1 μM)<br>34.9 °C (1 μM)   | 33.4 °C (0.1 μM)<br>39.6 °C (1 μM) |
|                    | Arm         | CCATGTTACCTTCCAC                    | 52.2 °C (0.1 μM)<br>56.3 °C (1 μM) | 54.9 °C (0.1 μM)<br>59.1 °C (1 μM) |
|                    | Core        | CGACTGACTCTGACTGCGATG               | 63.7 °C (0.1 μM)<br>66.9 °C (1 μM) | 65.2 °C (0.1 μM)<br>68.3 °C (1 μM) |
| F-unit (short arm) | Arm         | TACCTTCCAC                          | 31.4 °C (0.1 μM)<br>37.6 °C (1 μM) | 35.9 °C (0.1 μM)<br>42.3 °C (1 μM) |

Oligoanalyzer simulation was performed with the following conditions.

\* 1x DPBS buffer: 150 mM Na<sup>+</sup>

\*\* 1x TAE/12.5 mM MgCl<sub>2</sub> buffer: 50 mM Na<sup>+</sup> and 12.5 mM Mg<sup>+2</sup>

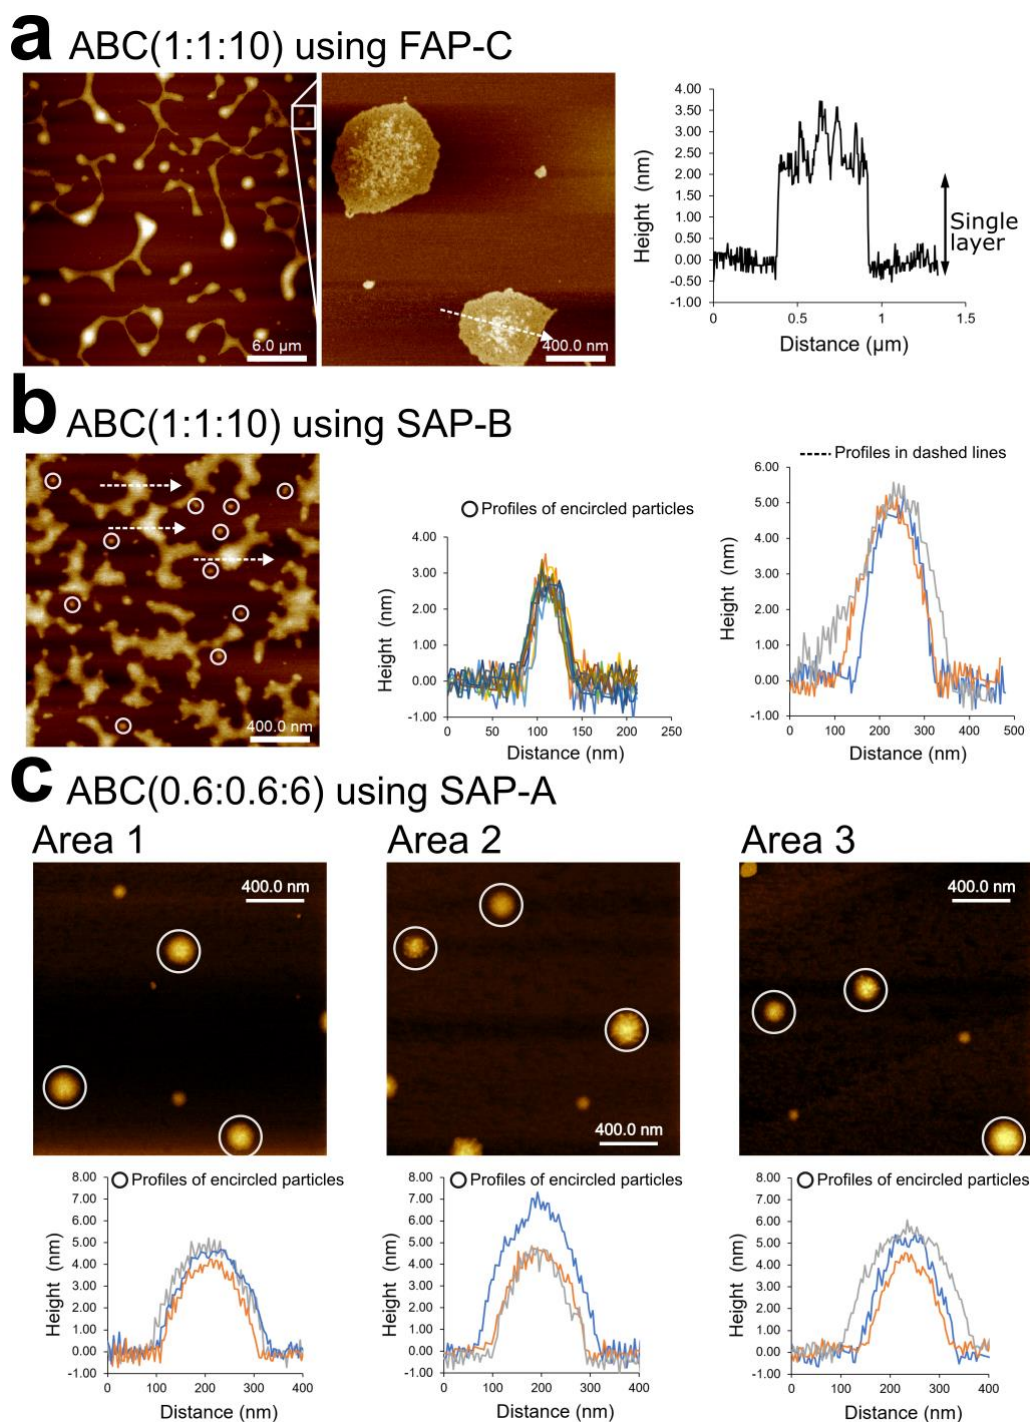

**Figure S1.** AFM characterization of F-unit superstructures assembled in liquid phase. **(a)** ABC(1:1:10) using FAP-C. A height profile is shown.  $[A] = 50 \text{ nM}$ . **(b)** ABC(1:1:10) using SAP-B. The height profile of encircled particles and asymmetrical structures are shown.  $[A] = 50 \text{ nM}$ . **(c)** ABC(0.6:0.6:6) using SAP-A. Three scanning areas (top), and the height profile of particles (bottom) are shown.  $[A] = 30 \text{ nM}$ .

**a** ABC(20:20:200) using FAP-C

Area 1

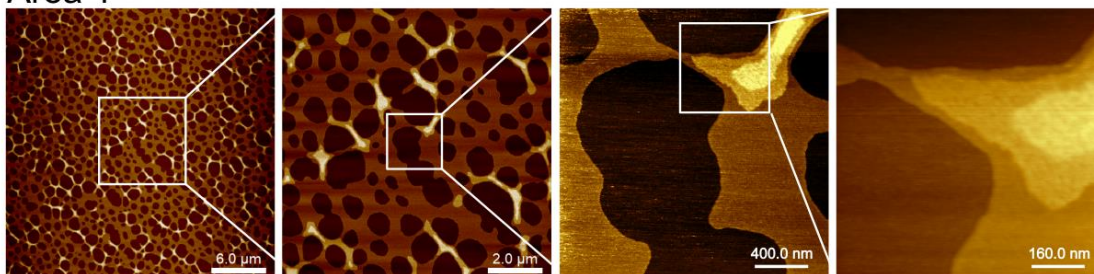

Area 2

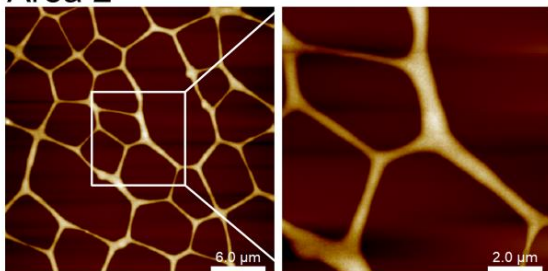

**b** ABC(20:20:200) using FAP-B

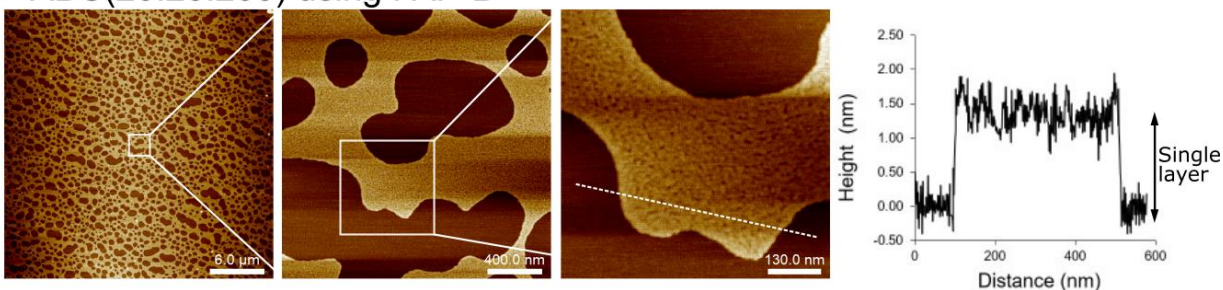

**Figure S2.** AFM characterization of F-unit superstructures assembled in liquid phase **(a)** ABC(20:20:200) using FAP-C. Two scanning areas are shown. Area 1 shows a multilayer nanosheet. Area 2 shows a network of connected nanotubes.  $[A] = 1 \mu\text{M}$ . **(b)** ABC(20:20:200) using FAP-B. A height profile is shown.  $[A] = 1 \mu\text{M}$ .

ABC(100:100:1000) using FAP-C  
Area 1

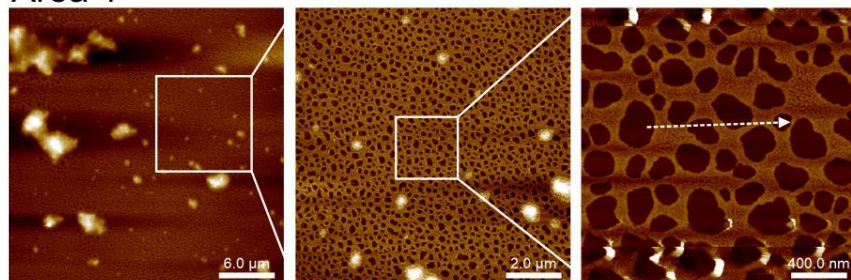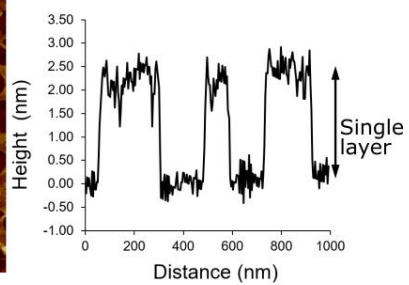

Area 2

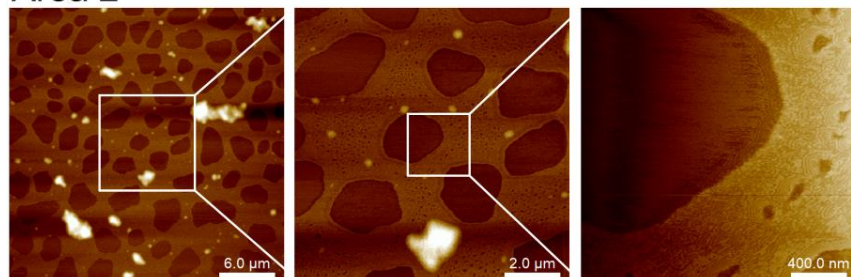

Area 3

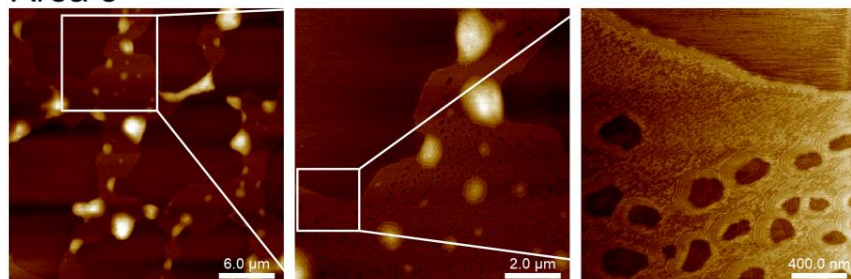

Area 4

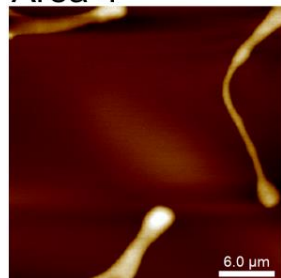

**Figure S3.** AFM characterization of F-unit superstructures assembled in liquid phase. ABC(100:100:1000) using FAP-C. Four scanning areas are shown. Area 1 shows a large coverage of a single-layer nanosheet with particles on top.  $[A] = 5 \mu\text{M}$ .



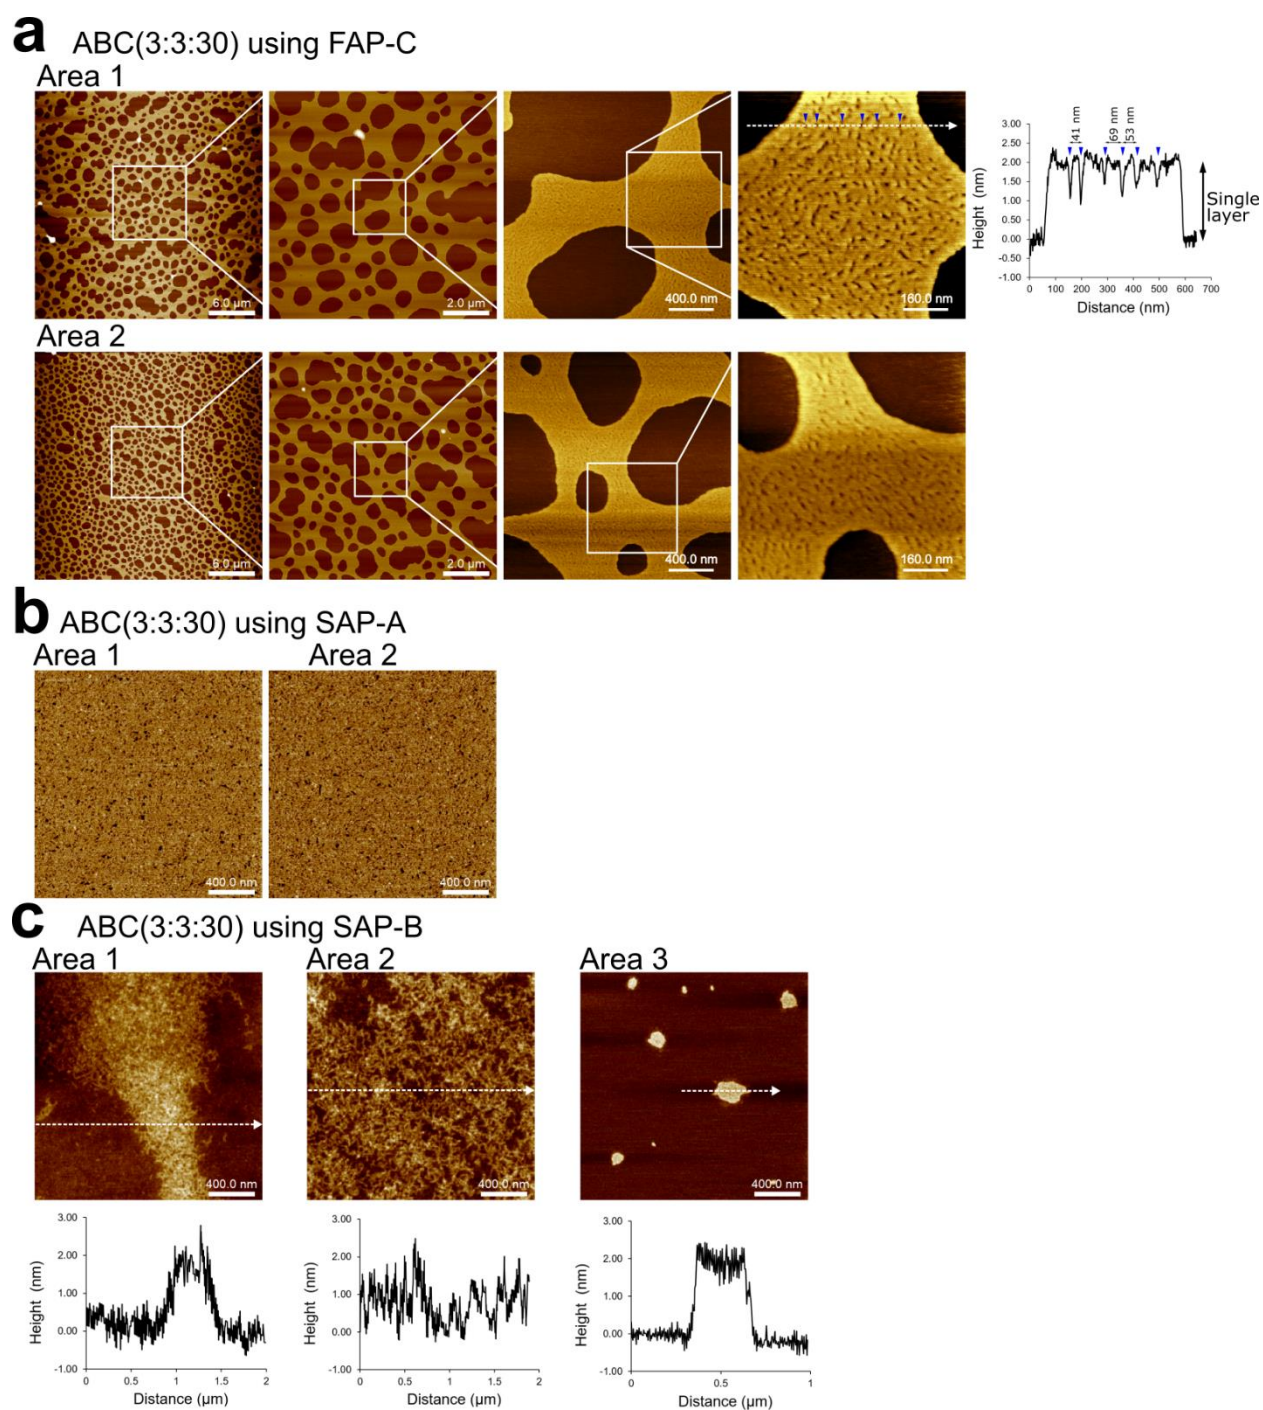

**Figure S4.** AFM characterization of F-unit superstructures assembled in liquid phase. **(a)** ABC(3:3:30) using FAP-C. Two scanning areas, and a representative height profile are shown.  $[A] = 150 \text{ nM}$ . **(b)** ABC(3,3,30) using SAP-A. Two scanning areas are shown.  $[A] = 150 \text{ nM}$ . **(c)** ABC(3,3,30) using SAP-B. Three scanning areas (top) with representative height profiles (bottom) are shown.  $[A] = 150 \text{ nM}$ .

## Text S2

By assuming that the surface density of  $C_{\text{chol}}$  (21 bases plus the hydrophilic flexible TEG linker) at the oil/aqueous interface is limited by the radius of gyration of DNA and the electrostatic repulsion between  $C_{\text{chol}}$  strands, the space occupied by each  $C_{\text{chol}}$  can be approximated as the sum of the radius of gyration of the DNA strand and the length of the flexible TEG linker, which are  $\sim 2$  nm (interpolating from [1]) and  $\sim 2.25$  nm, [2] respectively. As a result, the cholesterol of  $C_{\text{chol}}$  could be separated  $\sim 6$  nm, which could be longer due to the electrostatic repulsion between the DNA's backbones. This separation is in the same order of magnitude as the distance between cholesterol modifications in the F-unit design in Section 3.1 of the Main Text, i.e., a minimum distance of  $\sim 3$  nm and a maximum distance of  $\sim 14$  nm.

## Supplementary Information references

1. Sim, A.Y.L.; Lipfert, J.; Herschlag, D.; Doniach, S. Salt Dependence of the Radius of Gyration and Flexibility of Single-Stranded DNA in Solution Probed by Small-Angle X-ray Scattering. *Phys Rev E* **2012**, *86*, 21901, doi:10.1103/PhysRevE.86.021901.
2. Palma, E.; Klapper, D.G.; Cho, M.J. Antibodies as Drug Carriers III: Design of Oligonucleotides with Enhanced Binding Affinity for Immunoglobulin G. *Pharm Res* **2005**, *22*, 122–127, doi:10.1007/s11095-004-9017-z.
